# Supplementary material
Source: PubMed Central journal article supplement (PMC7045564)
Supplement: ao9b03855_si_001.pdf [file ao9b03855_si_001.pdf]

## SUPPORTING INFORMATION

### Post-SELEX Optimization and Characterization of a Prostate Cancer Cell-Specific Aptamer for Diagnosis

Esther Campos-Fernández,<sup>§</sup> Letícia S. Barcelos,<sup>§</sup> Aline G. Souza,<sup>§</sup> Luiz R. Goulart,<sup>§,‡</sup> and Vivian Alonso-Goulart.<sup>§\*</sup>

<sup>§</sup>Laboratory of Nanobiotechnology, Institute of Biotechnology, Federal University of Uberlândia, Uberlândia 38408-100, MG, Brazil.

<sup>‡</sup>Department of Medical Microbiology and Immunology, University of California-Davis, Davis 95616, CA, USA.

#### Corresponding Author

\*Vivian Alonso-Goulart; Laboratório de Nanobiotecnologia, Instituto de Biotecnologia, Universidade Federal de Uberlândia, AvenidaPará, 1720, Sala 248, Bloco 2E, Campus Umuarama, Uberlândia, MG, CEP: 38405-320, Brasil. Telephone number: +55(34)3225-8440. E-mail: alonso.goulart@ufu.br.

#### Table of contents

|                                               |    |
|-----------------------------------------------|----|
| Viability of prostate cells incubated with A4 | S1 |
| Migration of prostate cells incubated with A4 | S2 |

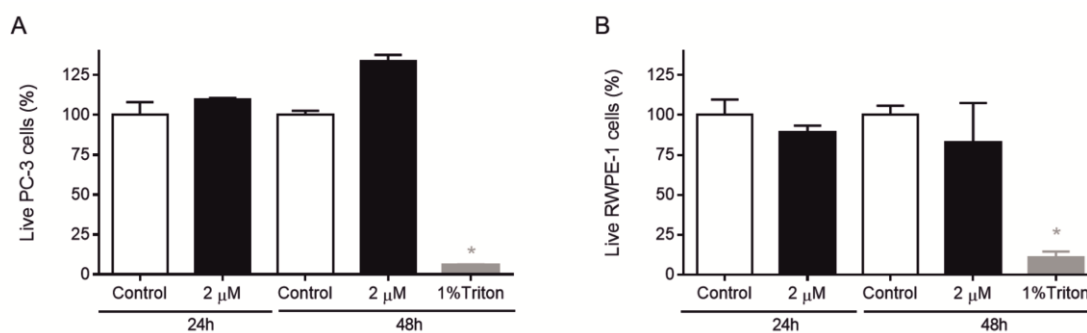

**Figure S1.** Viability of prostate cells incubated with A4. A. Percentage of live PC-3 cells grown in 3D cultures. B. Percentage of live RWPE-1 cells grown in 3D cultures. The data represent the means  $\pm$  standard errors of the means of triplicates, resulting from a spectrophotometric neutral red cell viability assay of the prostatic cell lines incubated with 2  $\mu$ M of A4 for 24 and 48 hours. The data were statistically analyzed using the one-way analysis of variance test with Tukey post-test, \* $p < 0.05$ .

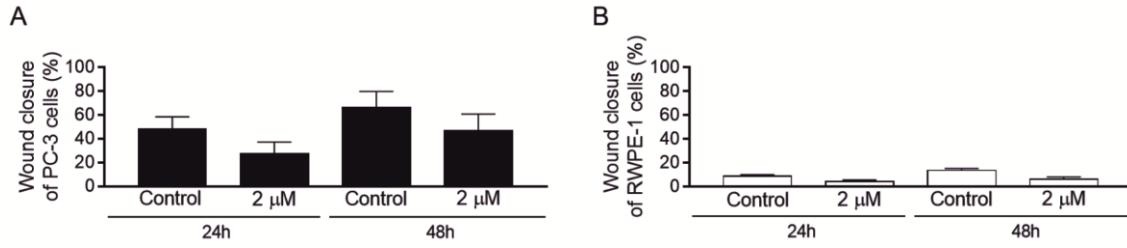

**Figure S2.** Migration of prostate cells incubated with A4. A. Wound closure percentage of PC-3 cells. B. Wound closure percentage of RWPE-1 cells. The data represent the means  $\pm$  standard errors of the means of triplicates, resulting from a wound healing assay of the prostatic cell lines incubated with 2  $\mu$ M of A4 for 24 and 48 hours. The data were statistically analyzed using the one-way analysis of variance test with Tukey post-test for PC-3 cells and Kruskal-Wallis test with Dunn post-test for RWPE-1 cells, \* $p < 0.05$ .
